# Supplementary material for: Characterization of a Novel Polysaccharide Lyase Family 5 Alginate Lyase with PolyM Substrate Specificity
Source: MDPI journal article supplement (doi:10.3390/foods11213527), 2022-11-06
Supplement: s1 [file s1]

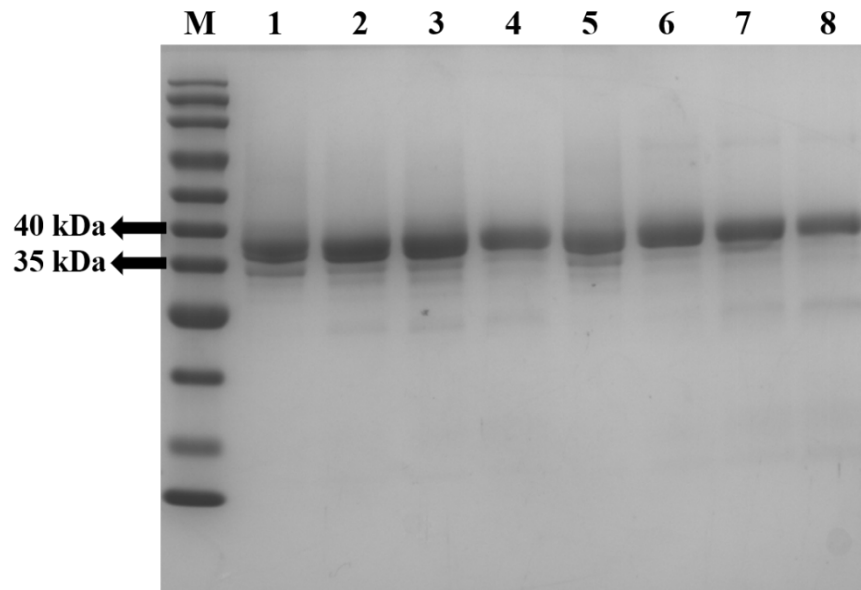

**Figure S1.** SDS-PAGE (12.5%, w/v) gel showing purified PMD and its mutants. Lane M, molecular weight marker; lane 1, purified PMD; lane 2, purified K58A; lane 3, R66A; lane 4, R78A; lane 5, K89A; lane 6, Y248A; lane 7, K313A; lane 8, R344A.

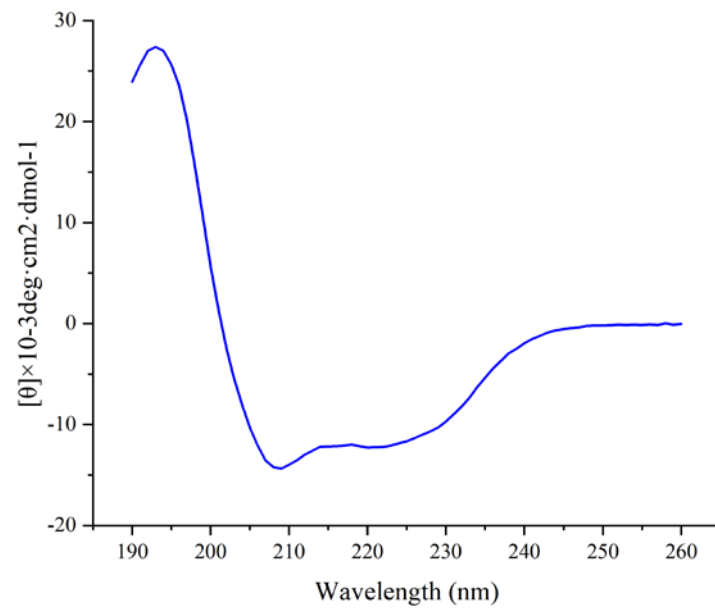

**Figure S2.** Circular Dichroism (CD) Spectra of PMD.

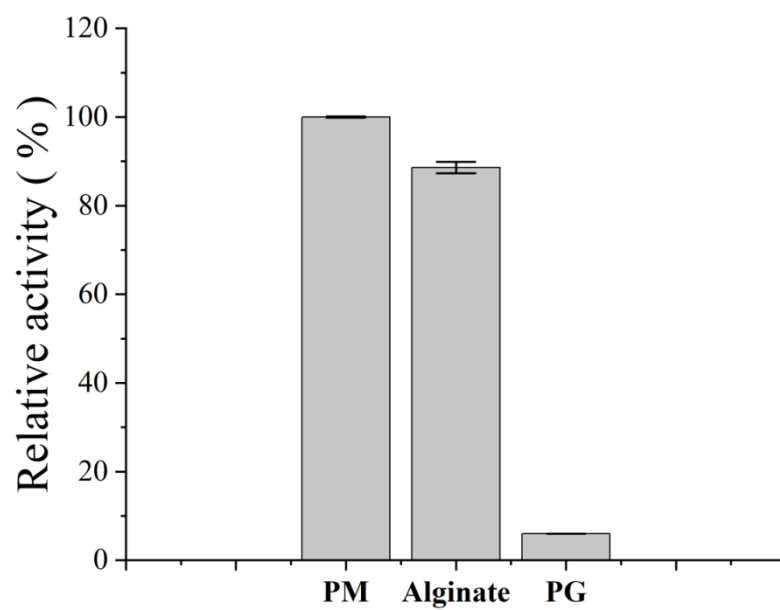

**Figure S3.** Relative activities of PMD towards PM, sodium alginate and PG (maximum activity was identified as 100%).

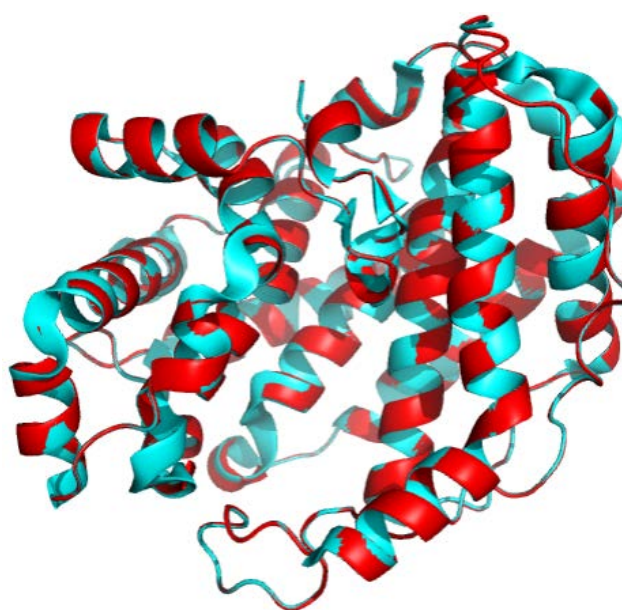

**Figure S4.** The superposition of the model built and the template. (the model built colored in red and the template colored in cyan)

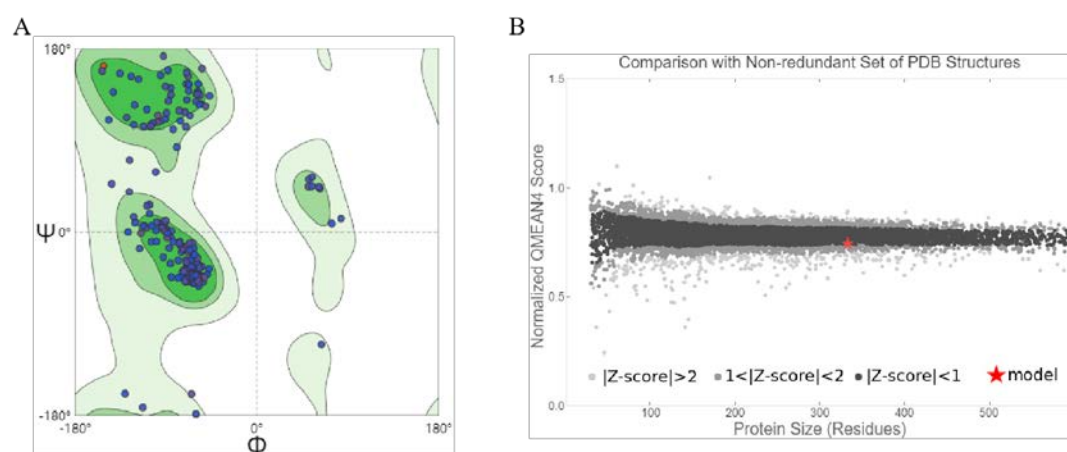

**Figure S5.** Quality assessment of PMD homology model. (A) Ramachandran Plots of homology model. (B) Quality comparison of homology model

| Composition    | Helix | Antiparallel | Parallel | Beta-Turn | Random | Total |
|----------------|-------|--------------|----------|-----------|--------|-------|
| Proportion (%) | 85.3  | 0.2          | 1.7      | 8.7       | 4.4    | 100.3 |

**Table S1.** The percentage of secondary structures calculated from the circular dichroism
